# Supplementary material for: Biomedical word sense disambiguation with ontologies and metadata: automation meets accuracy
Source: PubMed Central journal article supplement (PMC2663782; doi:10.1186/1471-2105-10-28), 2009-01-21
Supplement: 1471-2105-10-28-S2.pdf [file 1471-2105-10-28-S2.pdf]

# Biomedical word sense disambiguation with ontologies and metadata: automation meets accuracy

Dimitra Alexopoulou<sup>1†</sup>, Bill Andreopoulos<sup>1†</sup>, Heiko Dietze<sup>1</sup>, Andreas Doms<sup>1†</sup>, Fabien Gandon<sup>2</sup>, Jörg Hakenberg<sup>1</sup>, Khaled Khelif<sup>2†</sup>, Michael Schroeder<sup>\*1</sup> and Thomas Wächter<sup>1</sup>

<sup>1</sup>Biotechnology Center (BIOTEC), Technische Universität Dresden, 01062, Dresden, Germany

<sup>2</sup>INRIA Sophia Antipolis, 2004 Route des Lucioles, 06902, Sophia Antipolis, France

Email: Dimitra Alexopoulou - dimitra.alexopoulou@biotec.tu-dresden.de; Bill Andreopoulos - williamsa@biotec.tu-dresden.de; Heiko Dietze - heiko.dietze@biotec.tu-dresden.de; Andreas Doms - andreas.doms@biotec.tu-dresden.de; Fabien Gandon - Fabien.Gandon@sophia.inria.fr; Jörg Hakenberg - joerg.hakenberg@biotec.tu-dresden.de; Khaled Khelif - khaled.khelif@sophia.inria.fr; Michael Schroeder\* - ms@biotec.tu-dresden.de; Thomas Wächter - waechter@biotec.tu-dresden.de;

\*Corresponding author

## Supplementary Tables

**Table 6 - High quality / low quantity corpus: Precision / Recall / Specificity / F-measure for the baseline (bME) method on the GO and MeSH test datasets.**

5-fold cross validation on the high quality/low quantity corpus.

| Term        | neg | pos | P    | R    | S    | F    |
|-------------|-----|-----|------|------|------|------|
| Development | 111 | 98  | 0.84 | 0.98 | 0.81 | 0.9  |
| Spindle     | 50  | 48  | 1    | 0.96 | 0.96 | 0.98 |
| Nucleus     | 99  | 200 | 0.98 | 0.96 | 0.96 | 0.97 |
| Transport   | 102 | 91  | 1    | 0.81 | 0.75 | 0.89 |
| Thrush      | 17  | 80  | 0.77 | 0.88 | 0.87 | 0.82 |
| Lead        | 71  | 27  | 0.96 | 0.77 | 0.71 | 0.85 |
| Inhibition  | 98  | 100 | 0.93 | 0.92 | 0.91 | 0.92 |

**Table 7 - High quality / low quantity corpus: Precision / Recall / Specificity / F-measure for the MetaData (MD) method on the GO and MeSH test datasets.**

5-fold cross validation on the high quality/low quantity corpus.

| Term        | neg | pos | P    | R    | S    | F    |
|-------------|-----|-----|------|------|------|------|
| Development | 98  | 111 | 0.92 | 1    | 0.91 | 0.96 |
| Spindle     | 50  | 48  | 1    | 1    | 1    | 1    |
| Nucleus     | 99  | 200 | 1    | 0.99 | 0.99 | 0.99 |
| Transport   | 102 | 91  | 0.96 | 1    | 0.96 | 0.98 |
| Thrush      | 17  | 80  | 1    | 0.88 | 1    | 0.94 |
| Lead        | 71  | 27  | 0.74 | 1    | 0.64 | 0.85 |
| Inhibition  | 98  | 100 | 1    | 1    | 1    | 1    |

**Table 8 - MetaData (MD) method results: Training on medium quality/medium quantity corpus, testing on high quality/low quantity corpus.**

| Term        | neg train | pos train | neg test | pos test | P    | R    | S    | F    |
|-------------|-----------|-----------|----------|----------|------|------|------|------|
| Development | 271       | 56        | 98       | 111      | 0.67 | 0.99 | 0.52 | 0.80 |
| Spindle     | 70        | 48        | 50       | 48       | 0.63 | 1    | 0.42 | 0.77 |
| Nucleus     | 25        | 61        | 99       | 200      | 0.85 | 0.98 | 0.83 | 0.91 |
| Transport   | 102       | 56        | 102      | 91       | 0.84 | 1    | 0.80 | 0.91 |
| Thrush      | 42        | 5         | 17       | 80       | 1    | 0.88 | 1    | 0.94 |
| Lead        | 202       | 22        | 71       | 27       | 1    | 0.22 | 1    | 0.36 |
| Inhibition  | 454       | 79        | 98       | 100      | 0.96 | 0.94 | 0.96 | 0.95 |

Table 1: High quality / low quantity corpus: Precision/ Recall/ Specificity / F-measure for the Closest Sense (CS) method on the GO and MeSH test datasets.

| Term        | Classic distance (only subsumption) |      |      |               |      |      | Optimized signature + subsumption distance |      |      |               |      |      |      |      |      |
|-------------|-------------------------------------|------|------|---------------|------|------|--------------------------------------------|------|------|---------------|------|------|------|------|------|
|             | Threshold 0.8                       |      |      | Threshold 0.7 |      |      | Threshold 0.8                              |      |      | Threshold 0.7 |      |      |      |      |      |
|             | P                                   | R    | S    | P             | R    | S    | P                                          | R    | S    | P             | R    | S    |      |      |      |
| Development | 0.40                                | 0.94 | 0.59 | 0.56          | 0.98 | 0.78 | 0.97                                       | 0.87 | 0.83 | 0.71          | 0.77 | 0.98 | 0.79 | 0.86 | 0.86 |
| Spindle     | 0.65                                | 1    | 0.75 | 0.78          | 0.90 | 0.57 | 0.78                                       | 0.70 | 0.98 | 0.99          | 0.96 | 0.67 | 0.93 | 0.79 | 0.79 |
| Nucleus     | 0.63                                | 0.96 | 0.56 | 0.76          | 0.97 | 0.82 | 0.90                                       | 0.89 | 0.94 | 0.97          | 0.98 | 0.91 | 0.94 | 0.94 | 0.94 |
| Transport   | 0.24                                | 0.88 | 0.46 | 0.38          | 0.87 | 0.80 | 0.78                                       | 0.83 | 0.32 | 0.97          | 0.81 | 0.64 | 0.54 | 0.71 | 0.71 |
| Thrush      | 0.62                                | 1    | 0.38 | 0.76          | 0.89 | 0.88 | 0.50                                       | 0.88 | 0.97 | 0.99          | 0.98 | 0.89 | 1    | 0.94 | 0.94 |
| Lead        | 0.30                                | 0.57 | 0.77 | 0.39          | 0.41 | 0.32 | 0.75                                       | 0.36 | 0.30 | 0.57          | 0.74 | 0.42 | 0.86 | 0.53 | 0.53 |
| Inhibition  | 0.52                                | 0.70 | 0.62 | 0.60          | 0.89 | 0.52 | 0.60                                       | 0.66 | 0.85 | 0.96          | 1    | 0.73 | 1    | 0.84 | 0.84 |

Table 2: High quality / low quantity corpus: Precision / Recall / Specificity / F-measure for the Term Cooc (TC) method on the GO and MeSH test datasets.

| Term        | Co-occurrences |      |      | Hierarchical Cooc |      |      | Cooc + SVMs |      |      | Hierarchical Cooc + SVMs |      |      |      |      |      |
|-------------|----------------|------|------|-------------------|------|------|-------------|------|------|--------------------------|------|------|------|------|------|
|             | P              | R    | S    | P                 | R    | S    | P           | R    | S    | P                        | R    | S    | F    |      |      |
| Development | 0.74           | 0.74 | 0.31 | 0.74              | 0.70 | 0.72 | 0.71        | 0.61 | 0.54 | 0.91                     | 0.57 | 0.79 | 0.78 | 0.85 | 0.79 |
| Spindle     | 0.91           | 0.90 | 0.79 | 0.90              | 0.83 | 0.78 | 0.80        | 0.95 | 0.94 | 1                        | 0.95 | 0.98 | 0.98 | 1    | 0.98 |
| Nucleus     | 0.81           | 0.80 | 0.10 | 0.81              | 0.80 | 0.75 | 0.78        | 0.77 | 0.73 | 0.90                     | 0.75 | 0.95 | 0.95 | 0.90 | 0.95 |
| Transport   | 0.90           | 0.90 | 0.60 | 0.90              | 0.89 | 0.89 | 0.89        | 0.90 | 0.87 | 0.99                     | 0.88 | 0.94 | 0.93 | 1    | 0.94 |
| Thrush      | 0.92           | 0.83 | 0.94 | 0.87              | 0.82 | 0.82 | 0.82        | 0.89 | 0.70 | 1                        | 0.78 | 0.89 | 0.74 | 1    | 0.81 |
| Lead        | 0.89           | 0.89 | 0.94 | 0.89              | 0.81 | 0.35 | 0.49        | 0.93 | 0.92 | 0.93                     | 0.93 | 0.80 | 0.81 | 0.95 | 0.81 |
| Inhibition  | 0.78           | 0.76 | 0.62 | 0.77              | 0.72 | 0.55 | 0.62        | 0.85 | 0.85 | 0.65                     | 0.85 | 0.59 | 0.56 | 0.85 | 0.58 |

Table 3: Medium quality / medium quantity corpus: Precision / Recall / Specificity / F-measure for the Term Cooc (TC) method on the GO and MeSH test datasets.

| Term        | Co-occurrences |      |      |      | Hierarchical Cooc |      |      |      | Cooc + SVMs |      |      |      | Hierarchical Cooc + SVMs |      |      |      |
|-------------|----------------|------|------|------|-------------------|------|------|------|-------------|------|------|------|--------------------------|------|------|------|
|             | P              | R    | S    | F    | P                 | R    | S    | F    | P           | R    | S    | F    | P                        | R    | S    | F    |
| Development | 0.76           | 0.78 | 0.74 | 0.77 | 0.76              | 0.64 | 0.66 | 0.69 | 0.76        | 0.77 | 0.85 | 0.77 | 0.78                     | 0.80 | 0.85 | 0.79 |
| Spindle     | 0.76           | 0.75 | 0.70 | 0.75 | 0.80              | 0.75 | 0.62 | 0.77 | 0.81        | 0.77 | 0.92 | 0.79 | 0.81                     | 0.79 | 0.96 | 0.80 |
| Nucleus     | 0.86           | 0.85 | 0.51 | 0.85 | 0.84              | 0.84 | 0.48 | 0.84 | 0.80        | 0.36 | 0.82 | 0.50 | 0.83                     | 0.60 | 0.93 | 0.70 |
| Transport   | 0.89           | 0.89 | 0.90 | 0.89 | 0.87              | 0.87 | 0.87 | 0.87 | 0.80        | 0.75 | 0.98 | 0.78 | 0.83                     | 0.78 | 0.98 | 0.80 |
| Thrush      | 0.73           | 0.71 | 0.82 | 0.72 | 0.77              | 0.65 | 0.71 | 0.71 | 0.88        | 0.15 | 0.11 | 0.26 | 0.75                     | 0.83 | 0.87 | 0.78 |
| Lead        | 0.83           | 0.80 | 0.87 | 0.82 | 0.84              | 0.76 | 0.81 | 0.80 | 0.82        | 0.82 | 0.80 | 0.82 | 0.82                     | 0.82 | 0.80 | 0.82 |
| Inhibition  | 0.74           | 0.80 | 0.80 | 0.77 | 0.74              | 0.75 | 0.74 | 0.75 | 0.70        | 0.61 | 0.61 | 0.65 | 0.69                     | 0.54 | 0.58 | 0.61 |

Table 4: Low quality / high quantity corpus: Precision / Recall / Specificity / F-measure for the Term Cooc (TC) method on the GO and MeSH test datasets.

| Term        | Co-occurrences |      |      | Hierarchical Cooc |      |      | Cooc + SVMs |      |      | Hierarchical Cooc + SVMs |      |      |      |      |      |      |
|-------------|----------------|------|------|-------------------|------|------|-------------|------|------|--------------------------|------|------|------|------|------|------|
|             | P              | R    | S    | F                 | S    | F    | P           | R    | S    | P                        | R    | S    | F    |      |      |      |
| Development | 0.68           | 0.66 | 0.55 | 0.67              | 0.72 | 0.60 | 0.46        | 0.65 | 0.70 | 0.71                     | 0.73 | 0.70 | 0.74 | 0.75 | 0.83 | 0.74 |
| Spindle     | 0.79           | 0.80 | 0.63 | 0.79              | 0.79 | 0.78 | 0.45        | 0.78 | 0.83 | 0.76                     | 0.87 | 0.80 | 0.88 | 0.87 | 0.87 | 0.87 |
| Nucleus     | 0.94           | 0.81 | 0.77 | 0.87              | 0.96 | 0.95 | 0.74        | 0.96 | 0.94 | 0.80                     | 0.99 | 0.86 | 0.95 | 0.90 | 0.99 | 0.93 |
| Transport   | 0.69           | 0.68 | 0.61 | 0.69              | 0.71 | 0.72 | 0.52        | 0.72 | 0.71 | 0.63                     | 0.78 | 0.67 | 0.72 | 0.65 | 0.86 | 0.68 |
| Thrush      | 0.54           | 0.49 | 0.89 | 0.52              | 0.57 | 0.55 | 0.74        | 0.56 | 0.91 | 0.91                     | 0.91 | 0.91 | 0.43 | 0.45 | 0.80 | 0.44 |
| Lead        | 0.55           | 0.53 | 0.86 | 0.54              | 0.53 | 0.53 | 0.80        | 0.53 | 0.55 | 0.53                     | 0.78 | 0.54 | 0.49 | 0.51 | 0.70 | 0.50 |
| Inhibition  | 0.75           | 0.50 | 0.85 | 0.60              | 0.64 | 0.51 | 0.75        | 0.57 | 0.34 | 0.34                     | 0.51 | 0.34 | 0.26 | 0.28 | 0.37 | 0.27 |

Table 5: High quality / low quantity dataset with MeSH Text-mined annotations only: Precision / Recall / F-measure for the Term Cooc (TC) method on the GO and MeSH test datasets.

| Term       | Co-occurrences |      |      | Hierarchical Cooc |      |      | Cooc + SVMs |      |      | Hierarchical Cooc + SVMs |      |      |
|------------|----------------|------|------|-------------------|------|------|-------------|------|------|--------------------------|------|------|
|            | P              | R    | F    | P                 | R    | F    | P           | R    | F    | P                        | R    | F    |
| Thrush     | 0.54           | 0.25 | 0.34 | 0.69              | 0.46 | 0.55 | 0.86        | 0.83 | 0.85 | 0.86                     | 0.83 | 0.85 |
| Lead       | 0.72           | 0.75 | 0.73 | 0.69              | 0.73 | 0.72 | 0.80        | 0.35 | 0.48 | 0.81                     | 0.35 | 0.48 |
| Inhibition | 0.24           | 0.47 | 0.32 | 0.37              | 0.48 | 0.42 | 0.80        | 0.67 | 0.73 | 0.80                     | 0.67 | 0.73 |

**Table 9 - MetaData (MD) method results: Training on low quality/high quantity corpus, testing on high quality/low quantity corpus.**

| Term        | neg train | pos train | neg test | pos test | P    | R    | S    | F    |
|-------------|-----------|-----------|----------|----------|------|------|------|------|
| Development | 2296      | 715       | 98       | 111      | 0.67 | 1    | 0.50 | 0.80 |
| Spindle     | 519       | 599       | 50       | 48       | 0.65 | 1    | 0.46 | 0.79 |
| Nucleus     | 131       | 1336      | 99       | 200      | 0.63 | 1    | 0.40 | 0.77 |
| Transport   | 1043      | 699       | 102      | 91       | 0.80 | 1    | 0.74 | 0.88 |
| Thrush      | 35        | 1131      | 17       | 80       | 1    | 0.41 | 1    | 0.58 |
| Lead        | 1564      | 735       | 71       | 27       | 1    | 0.07 | 1    | 0.14 |
| Inhibition  | 5247      | 553       | 98       | 100      | 0.99 | 0.96 | 0.99 | 0.97 |

**Table 10 - Results (precision) of the Close Sense (CS) method tested on the WSD Test Collection (Weeber et al., 2001), with the use of classic distance (only subsumption) and with the use of the optimized signature together with the subsumption distance.**

| Term              | Only subsumption | Optimized |
|-------------------|------------------|-----------|
| adjustment        | 0.66             | 0.66      |
| ganglion          | 0.92             | 0.93      |
| extraction        | 0.62             | 0.65      |
| japanese          | 0.65             | 0.92      |
| pressure          | 0.98             | 0.86      |
| surgery           | 0.61             | 0.6       |
| depression        | 0.86             | 0.96      |
| lead              | 0.64             | 0.6       |
| radiation         | 0.94             | 0.92      |
| sensitivity       | 0.98             | 0.74      |
| transient         | 0.7              | 0.97      |
| fat               | 0.64             | 0.73      |
| growth            | 0.85             | 0.85      |
| man               | 0.87             | 0.87      |
| sex               | 1                | 0.94      |
| cold              | 0.8              | 0.95      |
| fit               | 0.97             | 0.69      |
| immunosuppression | 0.68             | 0.84      |
| repair            | 0.65             | 0.74      |
| condition         | 0.79             | 0.8       |
| implantation      | 0.97             | 0.99      |
| strains           | 0.92             | 0.94      |
| Average           |                  |           |
| precision         | 0.8              | 0.83      |
